# Supplementary material for: Petrography, Palynology, and Organic Geochemistry of Neogene Paralic Coal, Mukah,Sarawak, Malaysia: Implications For Paleomires, and Peat-Forming Conditions
Source: Research Square preprint supplement (doi:10.21203/rs.3.rs-952318/v1), 2021-10-08
Supplement: Supplementary file 1 [file c8d030faa9b28301cafdb8d5.docx]

# Appendix I

Peak assignments for hydrocarbons in chromatograms of saturated fractions in the *m/z* 123 (I), *m/z* 191 (II) and *m/z* 217 (III) mass fragmentograms (use for reference to explain Fig. 6).

| (I) Peak *no*. | Compound abbreviation | Cno |
| --- | --- | --- |
| 1 | Labdane |  |
| 2 | 19-Norisopimarane |  |
| 3 | ent-Beyerane |  |
| 4 | iso-Pimarane |  |
| 5 | 16b-Phyllocladane |  |
| 6 | 16a-Kaurane |  |
| 7 | 16a-Phyllocladane |  |
| 8 | 16|3-Kaurane |  |
| Rdit = (2 + 4 + 6)/(3 + 5 + 7) | |  |
| (II) Peak *no*. | Compound abbreviation |  |
| Ts | 18α(H),22,29,30-trisnorneohopane | Ts |
| Tm | 17α(H),22,29,30-trisnorhopane | Tm |
| 29 | 17α,21β(H)-nor-hopane | C29 hop |
| 29M | 17β(H),21α(H)-hopane (moretane) | C29Mor |
| 30 | 17α,21β(H)-hopane | Hopane |
| 30M | 17 β,21α (H)-Moretane | C30Mor |
| 31S | 17α,21β(H)-homohopane (22S) | C31(22S) |
| 31R | 17α,21β(H)-homohopane (22R) | C31(22R) |
| 32S | 17α,21β(H)-homohopane (22S) | C32(22S) |
| 32R | 17α,21β(H)-homohopane (22R) | C32(22R) |
| 33S | 17α,21β(H)-homohopane (22S) | C33(22S) |
| 33R | 17α,21β(H)-homohopane (22R) | C33(22R) |
| 34S | 17α,21β(H)-homohopane (22S) | C34(22S) |
| 34R | 17α,21β(H)-homohopane (22R) | C34(22R) |
| 35S | 17α,21β(H)-homohopane (22S) | C35(22S) |
| 35R | 17α,21β(H)-homohopane (22R) | C35(22R) |
| (III) Peak *no*. | Compound abbreviation |  |
| a | 13β,17α(H)-diasteranes 20S | Diasteranes |
| b | 13β,17α(H)-diasteranes 20R | Diasteranes |
| c | 13α,17β(H)-diasteranes 20S | Diasteranes |
| d | 13α,17β(H)-diasteranes 20R | Diasteranes |
| e | 5α,14α(H), 17α(H)-steranes 20S | ααα20S |
| f | 5α,14β(H), 17β(H)-steranes 20R | αββ20R |
| g | 5α,14β(H), 17β(H)-steranes 20S | αββ20S |
| h | 5α,14α(H), 17α(H)-steranes 20R | ααα20R |
